# Supplementary material for: Study protocol: HepaT1ca – an observational clinical cohort study to quantify liver health in surgical candidates for liver malignancies
Source: Springer Nature journal article supplement (doi:10.1186/s12885-018-4737-3), 2018-09-12
Supplement: MOESM1 [file 16117616]

**FIELD**

Record ID

Event Name

Repeat Instrument

Repeat Instance

Data Access Group

Has the participant provided signed informed consent?

Is the patient being considered for liver resection / TACE (for primary or secondary liver lesions)?

Is the patient under the age of 18?

Is the patient a prisoner?

Is the patient unable to have an MRI scan (including but not limited to claustrophobia, implanted metallic devices, metal foreign body)?

Is the patient an adult with incapacity?

Is the participant eligible to participate in the study?

Complete?

Participant Cohort

Age (years)

Sex

Ethnicity

Please specify ethnicity

Expected pathology

Please specify expected pathology

Complete?

Ultrasound

Date of most recent scan

CT

Date of most recent scan

MRI

Date of most recent scan

MRCP

Date of most recent scan

PET

Date of most recent scan

Endoscopic ultrasound

Date of most recent scan

Laparoscopy +/- intraoperative USS

Date of most recent scan

Liver biopsy

Date of most biopsy

CEA

Alpha fetoprotein

CA 19-9

Complete?

ECOG score

Complete?

Does the participant have any comorbidities?

Ischaemic heart disease  
Congestive Heart Failure  
Valvular Heart Disease  
Please specify  
Chronic Kidney Disease  
Please select stage  
Cerebrovascular Disease (e.g. TIA, stroke, CVA)  
Peripheral Vascular Disease  
Chronic Respiratory Disease  
Asthma  
COPD  
Other Chronic Respiratory Disease  
Please specify  
Diabetes  
Diabetes type  
Please specify  
Complete?  
Known liver disease  
If yes, aetiology  
Aetiology - other  
If yes, second aetiology  
Second aetiology - other  
Pre-operative diagnosis of cirrhosis  
Complete?

Is the participant part of a nested cohort requiring a second pre-operative scan?

Please specify cohort  
Complete?  
Blood sample date  
WBC ( $\times 10^9/L$ )  
RBC ( $\times 10^{12}/L$ )  
Hb (g/L)  
HCT  
MCV (fL)  
PLT ( $\times 10^9/L$ )  
Neutrophils ( $\times 10^9/L$ )  
Lymphocytes ( $\times 10^9/L$ )  
Fibrinogen (g/L)  
APTT (Seconds)  
PT (seconds)  
INR  
EDTA collected (plasma analysis)  
Gel clot-activator collected (serum analysis)  
PaxGene DNA collected (DNA extraction)  
PaxGene RNA collected (Total RNA extraction)  
Complete?  
Sodium (mmol/L)  
Potassium (mmol/L)

Urea (mmol/L)  
Creatinine (umol/L)  
Glucose (mmol/L)  
Bilirubin (umol/L)  
AST (U/L)  
ALT (U/L)  
Alk phos (U/L)  
GGT (U/L)  
Calcium (mmol/L)  
Albumin (g/L)  
Ferritin (ug/L)  
Transferrin (g/L)  
Serum Iron (umol/L)  
CRP (mg/L)  
Complete?  
Ascites  
Encephalopathy  
Albumin classification  
Bilirubin classification  
INR classification  
Ascites classification  
Encephalopathy classification  
Total score  
Class  
No. of previous decompensation episodes  
Meld score  
Complete?  
Spleen size recorded (USS)  
Spleen diameter (cm)  
Varices  
Banding Program  
Other evidence of portal hypertension  
Complete?  
Is the participant taking any medications?  
Complete?  
Any change in medication since last visit?  
Complete?  
Alcohol consumed  
What is the average weekly intake?  
Participant abstinent for..  
Coffee Intake  
If yes, specify  
Cups per day  
Current Status  
Pack years  
Complete?  
Colorectal Primary Tumour?  
Site of colorectal primary

Colorectal primary resected  
Date of resection  
Operation type  
Operation type - other, please specify  
Was colon op laparoscopic  
Endoscopic mucosal resection/polypectomy  
Colonic stent  
Tumour type - adenocarcinoma  
If no or variant, please specify  
Differentiation by predominant area  
TMN (tumour) stage  
TMN (node) stage  
TMN (metastasis) stage  
Duke's classification  
Colon resection status  
K-ras status  
N-ras status  
B-Raf status  
Mismatch repair status  
Pre-op (colon surgery) chemo  
Date chemo commenced  
Date of last chemo administration  
Number of cycles planned  
Number of cycles completed  
Total duration of chemo (months)  
Chemotherapy Regimen  
Chemotherapy regimen - other  
Grade 3 or 4 toxicities?  
Pre-op radiotherapy  
Complete?  
Pre-operative (liver surgery) chemotherapy  
Is this the same chemotherapy as colorectal primary tumour?  
Indication/intent  
Date chemo commenced  
Date chemo finished  
Number of cycles planned  
Number of cycles completed  
Chemotherapy Regimen  
Other chemotherapy regimen - please specify  
Response (N.B. local investigator assessed not RECIST criteria)  
Grade 3 or 4 toxicities?  
Date of last chemotherapy (prior to 2nd MRI scan or surgery)  
Pre-op portal vein embolization  
Pre-op portal vein embolization - please provide date  
Pre-PVE Future Liver Remnant Volume (ml)  
Pre-op biliary drainage  
Pre-op biliary drainage - please provide date  
Date of pre-op hepatic vein embolization

Complete?

Participant due to undergo TACE?

Albumin < 36 g/dL?

AFP >400 ng/mL?

Bilirubin >17 umol/L?

Max. tumour diameter >7 cm

HAP score

HAP class

Complete?

Heart rate (beats per min)

Blood pressure (sitting) mmHg Systolic

Blood pressure (sitting) mmHg Diastolic

Respiratory rate (breaths per min)

Tympanic temperature (C)

Weight (kg to the nearest 0.1 kg)

Height (cm)

Body mass index (kg/m<sup>2</sup>)

Complete?

Did operation go ahead?

Date of operation

Operation type

Operation type - other

Please give reason

ASA grade

Resection type

If anatomic resection please specify:

If anatomic resection, predicted SPECIMEN volume (cm<sup>3</sup>)

Total number of atypical incisions

Seg 1

Seg 2

Seg 3

Seg 4

Seg 5

Seg 6

Seg 7

Seg 8

Predicted total liver volume on imaging (cm<sup>3</sup>)

Predicted functional liver remnant volume (FLRV) (cm<sup>3</sup>)

Atypical excision(s)

Total number of Atypical excision(s)

Surgical access (abdominal)

Vascular resection (IVC/PV)

Additional extrahepatic procedure

Please specify additional extrahepatic procedure

Back table sample taken (tumour)

Back table sample taken (background liver)

Pringle

Pringle Total Time (mins)

Fibrin glue  
TachoSil  
Fibrin pad  
Operation duration - knife to skin to op end (mins)  
Estimated Intraoperative blood loss (mL)  
Intraoperative blood transfusion (units)  
Total blood transfusion (units)  
Abdominal drain placed at surgery  
Duration of drain placed at surgery (days)  
Abdominal drain placed percutaneously after surgery  
Duration of perc drain (days)  
Epidural  
Vasopressor use  
Vasopressor use (days)  
Haemofiltration/dialysis  
Haemofiltration/dialysis (days)  
Date of Admission to hospital  
Date of discharge or death  
Number of ICU admissions  
Number of HDU admissions  
Total Duration of ICU stay (days)  
Total duration of HDU stay (days)  
Complete?  
Participant undergone TACE  
Child Pugh increase (following TACE)  
AST increase >25% from baseline  
Radiologic tumour response  
ART score  
ART score group Low is 0 - 1.5 points High is  $\geq 2.5$  points  
Complete?  
Did the patient have major liver complications?  
Bleed  
return to theatre  
Liver failure  
percutaneous drainage of collection  
anastamotic leak requiring return to theatre  
other  
Other major liver complications - please specify  
Clavien Dindo  
INR  
Serum Bilirubin  
Serum Creatinine  
Encephalopathy grade (West Haven classification)  
Liver flap  
INR  
Serum Bilirubin  
Serum Creatinine  
Encephalopathy grade (West Haven classification)

Liver flap  
INR  
Serum Bilirubin  
Serum Creatinine  
Encephalopathy grade (West Haven classification)  
Liver flap  
INR  
Serum Bilirubin  
Serum Creatinine  
Encephalopathy grade (West Haven classification)  
Liver flap  
INR  
Serum Bilirubin  
Serum Creatinine  
Encephalopathy grade (West Haven classification)  
Liver flap  
INR  
Serum Bilirubin  
Serum Creatinine  
Encephalopathy grade (West Haven classification)  
Liver flap  
Complete?  
Is the participant still alive?  
If no, date of death  
Number of reported non-Liver complications  
Clavien Dindo  
Number of liver lesions  
Seg 1  
Seg 2  
Seg 3  
Seg 4  
Seg 5  
Seg 6  
Seg 7  
Seg 8  
Known vascular invasion  
Complete?

Clotting factors given to correct INR anytime up to and including day 5  
Elevated INR and increasing between day 4 and day 5  
Elevated bilirubin and increasing between day 4 and day 5

Abnormal liver blood tests but no change in management (ISGLS grade A)  
Abnormal liver blood tests requiring non-invasive change in management (ISGLS grade B)

Abnormal liver blood tests requiring invasive change in management (ISGLS grade C)  
Post-operative sepsis

Antibiotic duration (days)  
Blood cultures +ve at any stage post-op  
Organism  
Abdominal drain culture fluid +ve  
Drain culture organism  
Other culture site positive - please state site  
Other culture site organism  
Complete?  
Diagnosis  
Diagnosis - other, please specify  
If HCC  
If HCC - other, please specify  
If intrahepatic cholangiocarcinoma  
Specimen 1 length (mm)  
Specimen 1 width (mm)  
Specimen 1 depth (mm)  
Specimen 2 length (mm)  
Specimen 2 width (mm)  
Specimen 2 depth (mm)  
Specimen 3 length (mm)  
Specimen 3 width (mm)  
Specimen 3 depth (mm)  
Lesion 1 size (mm)  
Lesion 2 size (mm)  
Lesion 3 size (mm)  
Lesion 4 size (mm)  
Lesion 5 size (mm)  
>5 lesions, size of largest (mm)  
Completeness of resection  
Macroscopic distance from hepatic resection margin (mm)  
Tumour cells present at margin (microscopic)  
If margin is clear (microscopic), is clearance > 10 mm  
If no, minimum distance to margin (mm)  
Histological Grade  
Mucin Score  
Special Stains / IHC (e.g. Ki67)  
If yes, please specify  
Complete?  
Background liver assessed?  
Fat % core area (H&E)  
Fat % (oil-red O quantitation)  
Histological diagnosis of steatohepatitis  
Kleiner (Brunt) steatosis score  
NAFLD activity score (Hepatocyte ballooning)  
NAFLD activity score (Lobular inflammation)  
  
NAFLD activity score (NAS on H&E) (see appendix for scoring system)  
NASH-CRN fibrosis score



SAF ballooning score, with components  
SAF inflammation score  
Scheuer siderosis score  
Modified Ishak fibrosis score  
Chemo - perivenular sinusoidal dilatation  
Chemo - portal liver injury  
Complete?  
Date of scan  
Liver T1 - Mean (ms)  
Liver T2\* - Mean (ms)  
Liver Iron - mean (mg/g)  
Liver IDEAL PdFF - Mean (%)  
Liver cT1 - Mean (ms)  
Liver cT1 - Mode (ms)  
LIF score - Mean  
LIF 0-1 (%)  
LIF 1-2 (%)  
LIF 2-3 (%)  
LIF 3-4 (%)  
Spleen size - diameter (cm)  
Spleen volume (cm<sup>3</sup>)  
Splenic T1 - Mean (ms)  
Splenic T2\* - Mean (ms)  
Splenic cT1 - Mean (ms)  
Splenic cT1 - Mode (ms)  
Biliary tree volume (ml)  
Number of branches  
Biliary tree description  
ADC - Mean (mm<sup>2</sup>/s)  
D - Mean (mm<sup>2</sup>/s)  
D\* - Mean (mm<sup>2</sup>/s)  
F - Mean (%)  
Liver volume (ml)  
Predicted future liver remnant (%)  
Adverse Event description  
Start date (day)  
Start date (month)  
Start date (year)  
SAE  
Severity  
Causality  
Expectedness  
Date of assessment  
Initials of delegated clinician  
Outcome  
Resolved date  
Complete?  
Date of change of status / withdrawal

Participant deceased

Date of death

Who is withdrawing the participant from the trial?

Reason for withdrawal (please select one)

If Other, please specify

Withdrawal status

Complete?
